1 **Virulence evolution in the opportunistic bacterial pathogen *Pseudomonas***  
2 ***aeruginosa***

3

4 **Short Title: Virulence evolution in an opportunistic pathogen**

5

6 Elisa T. Granato<sup>1,2\*</sup>, Christoph Ziegenhain<sup>3,4</sup>, Rasmus L. Marvig<sup>5</sup>, Rolf Kümmerli<sup>1\*</sup>

7 <sup>1</sup>Department of Plant and Microbial Biology, University of Zurich, Zurich, Switzerland.

8 <sup>2</sup>Department of Zoology, University of Oxford, Oxford, United Kingdom.

9 <sup>3</sup>Department Biology II, Ludwig-Maximilians-University, Munich, Germany.

10 <sup>4</sup>Department of Cell and Molecular Biology, Karolinska Institutet, Stockholm, Sweden.

11 <sup>5</sup>Center for Genomic Medicine, Rigshospitalet, Copenhagen, Denmark.

12

13 \*Correspondence to: Elisa T. Granato, [elisa.granato@zoo.ox.ac.uk](mailto:elisa.granato@zoo.ox.ac.uk)

14 Rolf Kümmerli, [rolf.kuemmerli@uzh.ch](mailto:rolf.kuemmerli@uzh.ch)

15 **ABSTRACT**

16 Bacterial opportunistic pathogens are feared for their difficult-to-treat nosocomial infections and  
17 for causing morbidity in immunocompromised patients. Here, we study how such a versatile  
18 opportunist, *Pseudomonas aeruginosa*, adapts to conditions inside and outside its model host  
19 *Caenorhabditis elegans*, and use phenotypic and genotypic screens to identify the mechanistic  
20 basis of virulence evolution. We found that virulence significantly dropped in unstructured  
21 environments both in the presence and absence of the host, but remained unchanged in spatially  
22 structured environments. The observed virulence decline was driven by a substantial reduction in  
23 the production of multiple virulence factors, including siderophores, toxins, and proteases.  
24 Because these virulence factors are secreted, we argue that the spread of non-producers is at least  
25 partially due to cheating, where mutants exploit the shareable virulence factors produced by the  
26 wildtype. Whole-genome sequencing of evolved clones revealed positive selection and parallel  
27 evolution across replicates, and showed an accumulation of mutations in regulator genes,  
28 controlling the expression of these virulence factors. Our study identifies the spatial structure of  
29 the non-host environment as a key driver of virulence evolution in an opportunistic pathogen, and  
30 indicates that disrupting spatial structure in chronic infections could steer pathogen evolution  
31 towards lower virulence.

## 32 INTRODUCTION

33 Understanding how microbial pathogens evolve is essential to predict their epidemiological spread  
34 through host populations and the damage they can inflict on host individuals. Evolutionary theory  
35 offers a number of concepts aiming at forecasting the evolution of pathogen virulence and  
36 identifying the key factors driving virulence evolution [1,2]. While most evolutionary models  
37 agree that the spatial structure of the environment is an important determinant of virulence  
38 evolution, they differ on whether spatial structure should boost or curb pathogen virulence. One  
39 set of models predicts that high spatial structure lowers virulence, because it favors clonal  
40 infections and thereby limits the risk of hosts being infected by multiple competing pathogen  
41 lineages [3–6]. In this scenario, it is thought that within clonal infections, the interests of pathogen  
42 individuals are aligned, which should select for prudent host exploitation and thus low virulence  
43 [7,8]. Another set of models predicts that high spatial structure increases virulence because it  
44 favors the cooperative secretion of harmful virulence factors required for successful host  
45 colonization [5,9,10]. These models are based on the idea that virulence factors, such as toxins,  
46 proteases and iron-scavenging siderophores, are shared between pathogen individuals in infections  
47 [11–13]. Hence, low spatial structure is predicted to favor the evolution of cheating mutants that  
48 exploit the virulence factors produced by others, without contributing themselves [14]. Invasions  
49 of these cheats would then lower overall virulence factor availability and damage to the host [15–  
50 19].

51  
52 Both classes of models have received some empirical support. While experimental evolution  
53 studies with viruses showed that limited dispersal indeed favors more benign pathogens [20–22],  
54 work with bacteria showed evidence for the opposite pattern [17,23,24]. Although pioneering in

55 their own right, several fundamental questions have remained unaddressed so far. For one thing,  
56 the mechanistic basis of virulence evolution has often remained elusive [8,20,21,25]. Moreover,  
57 bacterial studies were mainly based on controlled mixed versus mono-infections using wildtype  
58 strains and engineered mutants deficient for virulence factor production. It thus remains unknown  
59 whether virulence-factor deficient mutants would indeed evolve *de novo* under low spatial  
60 structure and spread to high frequency. Finally, the bacterial studies used opportunistic pathogens,  
61 which were however generally directly transferred from host to host, thereby ruling out the  
62 possibility of these opportunists to adapt to the non-host environment, a factor that might clearly  
63 affect virulence evolution [26–28].

64  
65 Here we aim to tackle these unaddressed issues by conducting an experimental evolution study,  
66 where we (i) allow opportunistic bacterial pathogens to adapt both to the host and the non-host  
67 environment, (ii) manipulate the spatial structure of the environment, and (iii) uncover the targets  
68 of selection and mechanisms provoking virulence change using high-throughput phenotypic  
69 screening combined with whole-genome sequencing of evolved clones. For our approach, we used  
70 the opportunistic human pathogen *Pseudomonas aeruginosa* infecting its model host, the  
71 nematode *Caenorhabditis elegans* [29,30]. This bacterium is typically acquired by the host from  
72 an environmental reservoir [31,32], and nematodes can quickly become infected through the  
73 intestinal tract because they naturally feed on bacteria [33]. In our experiment, we let *P. aeruginosa*  
74 PAO1 wildtype bacteria evolve for 60 days in four different environments in eight-fold replication,  
75 implementing a 2x2 full factorial design (Fig. 1A). To assess the role of spatial structure of the  
76 environment (first factor) for virulence evolution, we let the pathogens evolve in either  
77 unstructured uniform liquid or spatially structured solid medium. To understand how adaptation

78 to the non-host environment affects virulence within the host, we further let the pathogens evolve  
79 both in the presence and the absence of the host (second factor). Following evolution, we  
80 quantified changes in pathogenicity for each independent replicate, and assessed whether these  
81 changes are associated with alterations in the expression of four important virulence factors of *P.*  
82 *aeruginosa*, which include the siderophore pyoverdine, the toxin pyocyanin, secreted proteases,  
83 and the ability to form biofilms. Finally, we whole-genome sequenced 140 evolved clones to map  
84 phenotypes to genotypes, and to test for positive selection, parallel evolution among independent  
85 replicates, and orders of mutations during evolution.

86

## 87 **RESULTS**

### 88 *Selection for reduced virulence in environments with low spatial structure*

89 Prior to experimental evolution, we found that the ancestral wildtype was highly virulent by killing  
90 76.2% and 83.9% of all host individuals within 24 hours in liquid and on solid media, respectively  
91 (Table S1). This pattern changed during evolution in spatially unstructured environments, where  
92 virulence dropped by 32.3% and 44.7% for populations that evolved with and without hosts,  
93 respectively (Fig. 1B+C, Fig. S1). Conversely, virulence remained high in structured  
94 environments. Overall, there was a significant effect of spatial structure on virulence evolution  
95 (linear mixed model:  $df_{\text{structure}} = 24.7$ ,  $t_{\text{structure}} = -2.11$ ,  $p_{\text{structure}} = 0.045$ ), while host presence did  
96 not seem to matter ( $df_{\text{host}} = 18.6$ ,  $t_{\text{host}} = 0.86$ ,  $p_{\text{host}} = 0.40$ ).

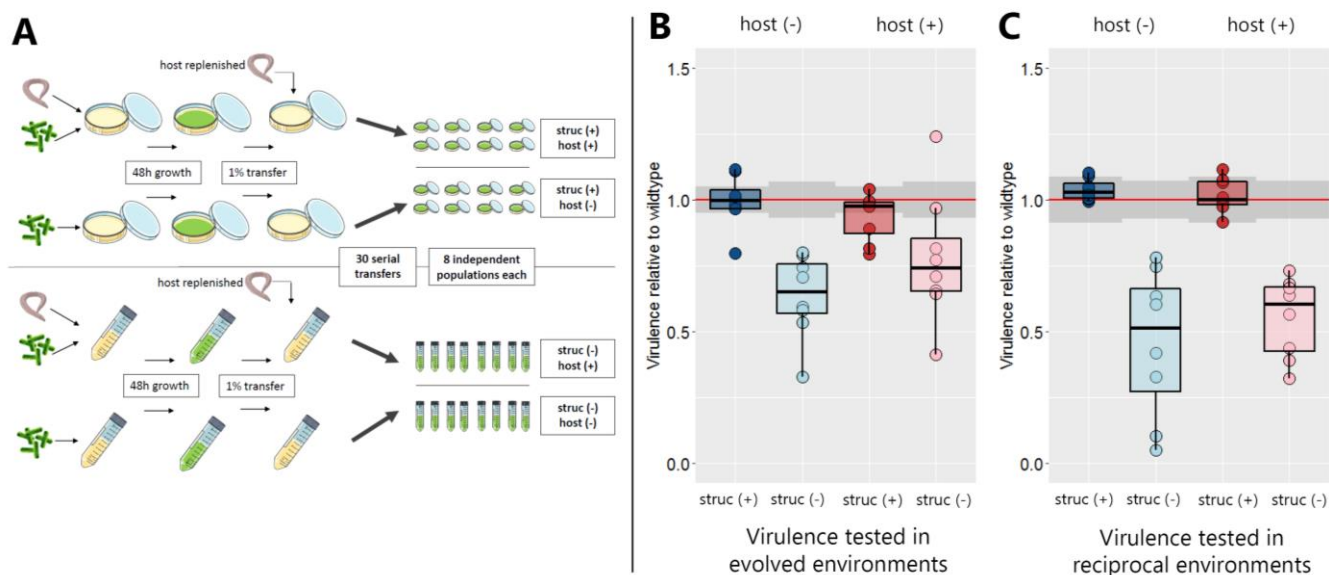

97

98 **Fig. 1. Virulence decreased during evolution in spatially unstructured environments.** (A)

99 Experimental design: *P. aeruginosa* PAO1 bacteria were serially transferred 30 times in four different

100 environments in 8-fold replication. These environments were either spatially structured (“struc +”) or

101 unstructured (“struc -“), and either contained (“host +”) or did not contain (“host -“) *C. elegans* nematodes

102 for the bacteria to infect. Subsequently, the evolved populations were tested for their virulence towards the

103 nematode under two different conditions: **(B)** In the environment the populations evolved in (i.e.

104 populations that evolved on agar plates tested on agar plates, populations that evolved in liquid culture

105 tested in liquid culture); and **(C)** in the reciprocal environment as a control (populations that evolved on

106 agar plates tested in liquid culture, populations that evolved in liquid tested on agar plates). Both assays

107 revealed that virulence significantly decreased during evolution in unstructured environments (Wilcoxon

108 rank-sum test,  $p < 0.05$ ; see Table S2). Virulence was quantified as percent nematodes killed at 24 h post

109 infection, scaled to the ancestral wildtype. Individual dots represent mean virulence of evolved populations.

110 The red line represents the average wildtype virulence level in the respective assay, with shaded areas

111 denoting the 95% confidence intervals.

112 *Treatment-specific changes in virulence factor production*

113 To explore whether shareable virulence factors were under selection and whether changes in  
114 virulence factor production could explain the evolution of virulence, we isolated 640 evolved  
115 clones and quantified their production of: (i) pyoverdine, required for iron-scavenging [34]; (ii)  
116 pyocyanin, a broad-spectrum toxin [35]; and (iii) proteases to digest extracellular proteins [36].  
117 We further quantified the pathogens' ability to form biofilms on surfaces, another social trait  
118 typically involved with virulence [37]. We focussed on these four virulence-related traits because  
119 of their demonstrated relevance in the *C. elegans* infection model [30,38–40].

120

121 Our phenotype screens revealed significant changes in the production of all four virulence factors  
122 (Fig. 2). For pyoverdine, we observed a significant decrease in pyoverdine production in  
123 unstructured environments without hosts, with many clones (44.4%) having completely lost the  
124 ability to produce pyoverdine (Fig. 2A). Since our media was iron-limited, impeding the growth  
125 of pyoverdine non-producers, these mutants likely represent social cheaters, exploiting the  
126 pyoverdine secreted by producers [41,42]. While mutants with abolished pyoverdine production  
127 also emerged in the unstructured environment with hosts, their frequency was much lower  
128 (5.0%). Apart from the unstructured environment without hosts, we observed a significant  
129 increase in pyoverdine production in evolved clones in all other treatments (Bayesian  
130 generalized linear mixed model, BGLMM:  $p_{\text{host:structure}} = 0.027$ ).

131

132 Pyocyanin production, meanwhile, significantly dropped in all four environments (Fig. 2B), but  
133 more so in the presence than in the absence of the host ( $p_{\text{host}} = 0.038$ ), while spatial structure  
134 had no effect ( $p_{\text{structure}} = 0.981$ ). The pattern of evolved protease production mirrored the one for

135 pyocyanin (Fig. 2C): there was a significant overall decrease in protease production, with a  
136 significant host ( $p_{\text{host}} = 0.042$ ), but no structure ( $p_{\text{structure}} = 0.489$ ) effect. Since neither pyocyanin  
137 nor proteases are necessary for growth in our media, consisting of a protein-digest, reduced  
138 expression could reflect selection against dispensable traits. During infections, however, these  
139 traits are known to be beneficial [38,40] and accelerated loss could thus be explained by  
140 cheating, as secreted virulence factors could become exploitable inside the host. It is known  
141 that protease production can be exploited by non-producing clones [36], and there is recent  
142 evidence that the same might apply to pyocyanin [43].

143  
144 Finally, the clones' ability to form surface-attached biofilms significantly increased in the presence  
145 of the host ( $p_{\text{host}} = 0.007$ ) and in structured environments ( $p_{\text{structure}} = 0.010$ ), but decreased in the  
146 host-free unstructured environment (Fig. 2D). These findings indicate that attachment ability might  
147 be superfluous under shaken conditions, but could become important within the host to increase  
148 residence time.



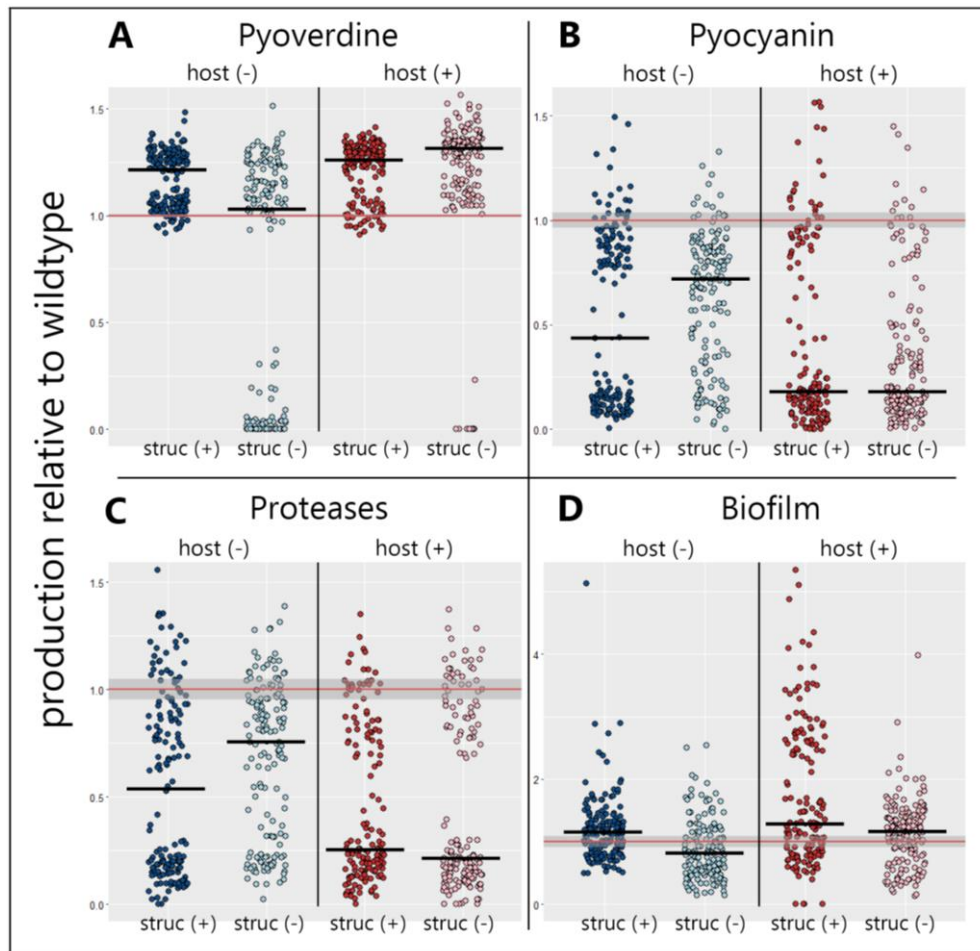

149  
150 **Fig. 2. Selection promoted shifts in virulence factor production during experimental evolution.** The  
151 production levels of four important virulence factors were determined for 640 evolved *P. aeruginosa* clones  
152 (20 clones per evolved line), and compared to the ancestral wildtype (mean  $\pm$  95 % confidence intervals  
153 indicated as red lines and shaded areas, respectively). (A) The production of the siderophore pyoverdine  
154 significantly decreased in the host-free unstructured environment, but significantly increased in all other  
155 environments. (B) The production of the toxin pyocyanin significantly decreased in all environments, but  
156 more so in the environments with the host. (C) The production of proteases also significantly decreased in  
157 all environments, with a sharper decline in environments with the host. (D) The clones' ability to form  
158 surface-attached biofilms significantly decreased in the unstructured host-free environment, but  
159 significantly increased in all other environments. host (-) = host was absent during evolution; host (+) =  
160 host was present during evolution; struc (-) = evolution in a liquid-shaken unstructured environment; struc  
161 (+) = evolution in a structured environment on agar. We used non-parametric Wilcoxon rank-sum test for  
162 comparisons relative to the ancestral wildtype, and Bayesian-based generalized linear mixed models to test  
163 for treatment effects (see Table S2). Solid black bars denote the median for each treatment.

164 *Aggregate change in virulence factor production correlates with evolved virulence*

165 While the phenotypic screens revealed altered virulence factor production levels, with significant  
166 host and environmental effects (Fig. 2), the virulence data suggest that there is no host effect, and  
167 spatial structure is the only determinant of virulence evolution (Fig 1). In the attempt to reconcile  
168 these apparently conflicting results, we first performed a principle component analysis (PCA)  
169 on population averages of the four virulence factor phenotypes (Fig. 3A). The PCA indicates  
170 that each treatment evolved in a different direction in the phenotype space, revealing that  
171 environmental and host factors indeed both seem to matter. This analysis further shows that the  
172 direction of phenotypic changes was aligned for some traits, but opposed for others (Fig. 3A, Fig.  
173 S2A-F). A decrease in pyocyanin production was generally connected to a decrease in protease  
174 production (Fig. S2D). On the other hand, decreased pyocyanin and protease production was  
175 associated with both higher pyoverdine and biofilm production (Fig. S2B+E).

176  
177 Given these opposing evolutionary directions and trade-offs between virulence factors we  
178 hypothesized that an increase in the production of one virulence factor could (at least partially) be  
179 counterbalanced by the reduction of another virulence factor. In the extreme case, two virulence  
180 factors could both be under selection, but in opposite directions, such that their net effects on  
181 virulence could cancel out. In line with this hypothesis, we found that the evolutionary change in  
182 virulence could only be explained when considering the aggregate change of all virulence factor  
183 phenotypes (Fig. 3B,  $R^2 = 0.33$ ,  $F(1,30) = 14.7$ ,  $p < 0.001$ ; also see Fig. S4), but not when  
184 focussing on single virulence factors (Fig. S3). Thus, decreased virulence in unstructured  
185 environments is attributable to a simultaneous decrease in the production of multiple virulence  
186 factors (i.e. pyocyanin, proteases, and sometimes pyoverdine). Conversely, unchanged

187 virulence in structured environments can be explained by compensatory effects (i.e. the  
188 reduction in pyocyanin and protease production is balanced by increased pyoverdine and  
189 biofilm production). Important to note is that the observed pyoverdine upregulation is  
190 presumably a compensatory phenotypic response, as decreased pyocyanin and protease  
191 production are known to lower iron availability [44], which in turn might trigger increased  
192 pyoverdine production.

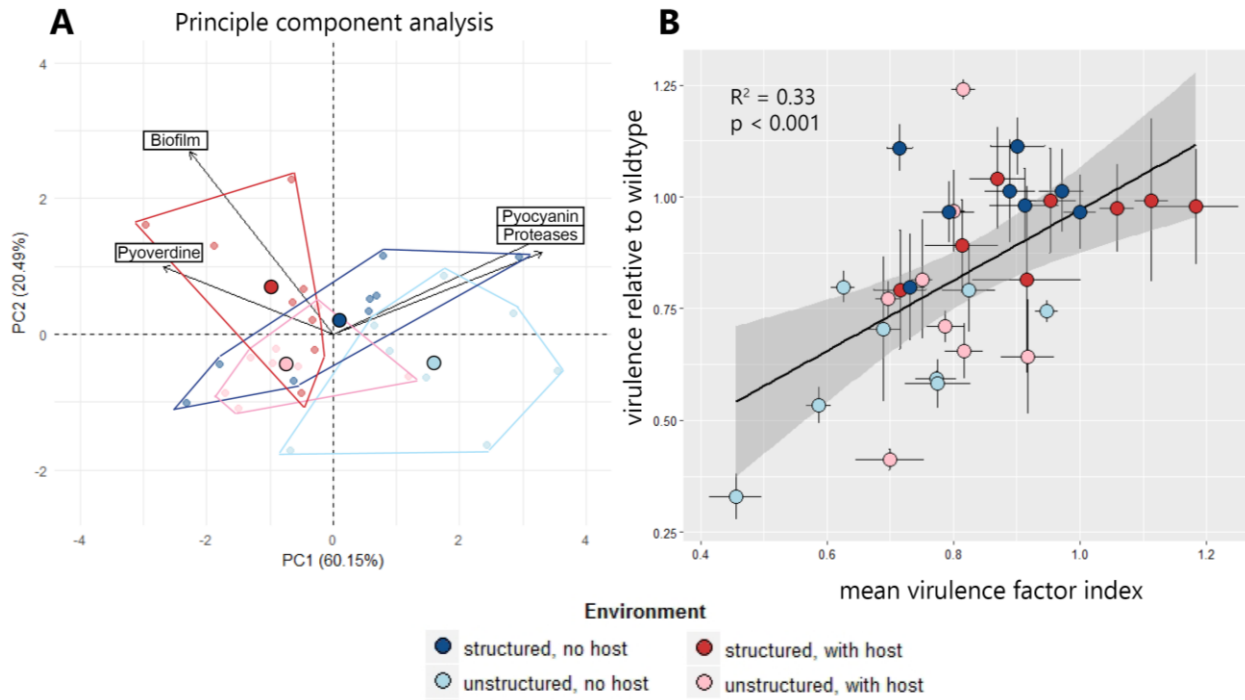

193

194 **Fig. 3. The aggregate change in virulence factor production explains virulence evolution.** (A) A  
195 principle component analysis (PCA) on the population-level changes in the production of four virulence  
196 factors (pyoverdine, pyocyanin, proteases, biofilm) reveals divergent evolutionary patterns. For instance,  
197 analysis of the first two principal components (explaining 80.6 % of the total variance) shows complete  
198 segregation between populations evolved in unstructured host-free environments and structured  
199 environments with the host. Moreover, the PCA reveals that evolutionary change was aligned for some  
200 traits (aligned vectors for pyocyanin and proteases), but opposed for others (inversed vectors for pyoverdine  
201 versus pyocyanin/proteases). Small and large symbols depict individual population values and average  
202 values per environment, respectively. Polygons show the boundaries in phenotype space for each  
203 environment. (B) We found that the aggregate change in the production of all four virulence factors  
204 explained the evolution of virulence. To account for the aligned and opposing effects revealed by the PCA,  
205 we defined the “virulence factor index” as the average change in virulence factor production across all four  
206 traits, scaled relative to the ancestral wildtype. Symbols and error bars depict mean values per population  
207 and standard errors of the mean, respectively.

208 *Mutations in key regulators explain changes in virulence factor phenotypes*

209 To examine whether genetic changes can explain the observed shifts in virulence factor  
210 production, we successfully sequenced the genome of 140 evolved clones from 16 independent  
211 populations and compared them to the ancestor. Relative to the ancestral wildtype, we identified  
212 182 mutations (153 SNPs and 29 microindels, i.e. small insertions and deletions), with 5-49  
213 mutations per population (median = 8.5). Individual clones accumulated 0-5 mutations, except for  
214 one clone (PA-030) with 42 mutations, of which 41 mutations were in a 5022 bp Pf1 prophage  
215 region, a known mutational hotspot [45].

216  
217 We identified 18 loci (genes and intergenic regions) that were independently mutated in at least  
218 two populations (Fig. 4A). The most frequently mutated gene was *lasR*, encoding the regulator of  
219 the Las quorum-sensing (QS) system. The second most frequent mutational target were ten  
220 different *pil* genes, involved in type IV pili biosynthesis and twitching motility. The frequent  
221 mutations in this cluster suggest that mutations in any of these genes could potentially lead to a  
222 similar beneficial phenotype. Finally, the *pvdS* coding region or the *pvdG-pvdS* intergenic region,  
223 containing the *pvdS* promoter, were also often mutated (i.e. in five populations). PvdS is the iron-  
224 starvation sigma factor controlling pyoverdine synthesis, and mutations in this gene can lead to  
225 pyoverdine deficiency [19,42].

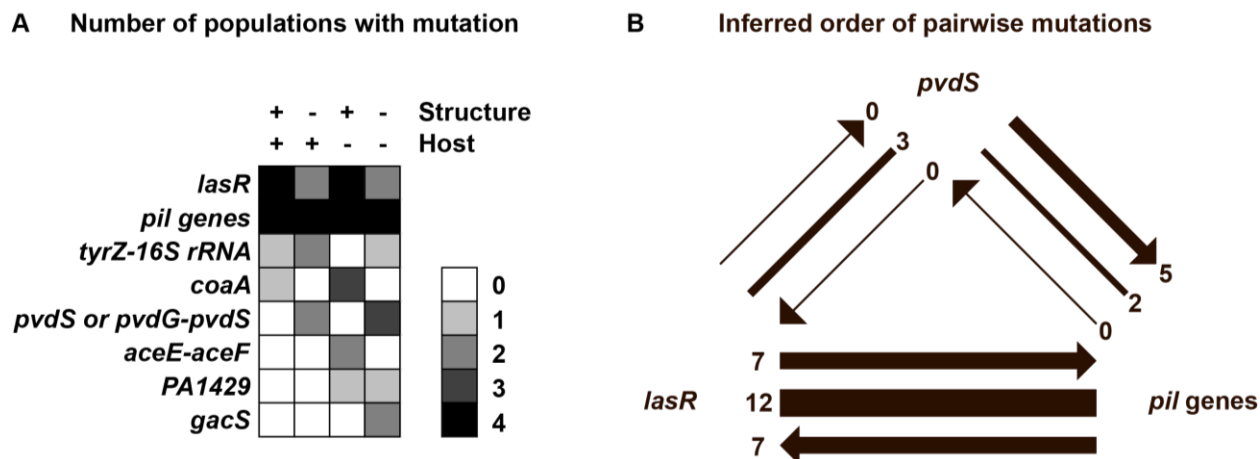

226

227 **Fig. 4. Whole genome sequencing reveals mutational profiles and order of mutations.** The whole  
 228 genomes of 140 evolved clones (four populations per environment and eight to nine clones per population)  
 229 were sequenced and SNPs and INDELS were called relative to the ancestral wildtype. (A) List of the loci  
 230 that were mutated in at least two populations. The scale of grey shadings corresponds to the number of  
 231 populations from each experimental condition in which clones with mutations in the respective loci  
 232 occurred. (B) Phylogenetic interference of the order of mutations among clones harboring mutations in two  
 233 of the most frequently concerned loci. Order of mutations are indicated by arrows pointing towards the loci  
 234 that were mutated second. Lines without arrowheads indicate that phylogenetic inference could not resolve  
 235 the order of mutations.

236 We found that two of these frequently mutated targets explained a large proportion of the altered  
237 virulence factor phenotypes (Fig. 5). Specifically, reduced pyoverdine production was  
238 significantly associated with mutations in the *pvdS* gene or its promoter region ( $F(1,137) = 240.1$ ,  
239  $p < 0.0001$ , Fig. 5A). Moreover, there were significant correlations between reduced pyocyanin  
240 and protease production and mutations in *lasR* (pyocyanin:  $F(1,137) = 18.76$ ,  $p < 0.0001$ ;  
241 proteases:  $F(1,137) = 16.04$ ,  $p < 0.001$ , Fig. 5B+C). In roughly half of the clones (pyocyanin:  
242 51.3%, proteases: 45.6%), reduced production levels could be attributed to mutations in *lasR*.  
243 While the Las-system directly controls the expression of proteases, pyocyanin is only indirectly  
244 linked to this QS-system, via the two subordinate Rhl and PQS quorum sensing systems [46]. We  
245 further analyzed whether the mutations in the type IV pili genes affected biofilm formation.  
246 Although type IV pili can be important for bacterial attachment to surfaces [47], there was no clear  
247 relationship between these mutations and the evolved biofilm phenotypes (Fig. S5). This is  
248 probably because biofilm formation is a quantitative trait, involving many genes, and because we  
249 found both evolution of increased and decreased biofilm production, which complicates the  
250 phenotype-genotype matching.

251

### 252 *Mutational patterns reveal evidence for positive selection and parallel evolution*

253 To test whether the mutated loci were under positive selection, we calculated the relative rates of  
254 nonsynonymous to synonymous SNPs (dN/dS) for loci mutated in at least two populations and for  
255 loci mutated only once. We found dN/dS = 6.2 for loci mutated in parallel in multiple populations,  
256 suggesting significant positive selection ( $P(X \geq 74) \sim \text{pois}(\lambda=12) < 1.1 \times 10^{-16}$ , where  $\lambda$  is the  
257 expected number of nonsynonymous SNPs under neutral evolution and X is the observed number  
258 of nonsynonymous SNPs). Conversely, dN/dS = 0.3 for loci mutated in only a single population,

259 indicating that these loci were under negative selection ( $P(X \leq 26) \sim \text{pois}(\lambda=87) < 1.5 \times 10^{-14}$ ).

260 Altogether, our findings reveal that the 18 loci with multiple mutations underwent adaptive parallel  
261 evolution.

262

263 Finally, we used phylogenetic inference to resolve the order of mutations involving the *lasR*, *pvdS*,  
264 and *pil* genes (Fig. 4B). Such analyses could reveal whether selection of mutations in certain genes  
265 is dependent on previous mutations in other genes. When analyzing evolved clones that mutated  
266 in at least two of these loci, we observed no clear patterns of dependencies in the order of mutations  
267 in *lasR-pil*-mutants and *lasR-pvdS*-mutants. For *pvdS-pil*-mutants, meanwhile, we found that  
268 mutations in *pvdS* tended to precede the mutations in *pil* genes. While sample size is too low to  
269 draw any strong conclusions, this observation could indicate that mutations in type IV pili are  
270 particularly beneficial in a pyoverdine-negative background.



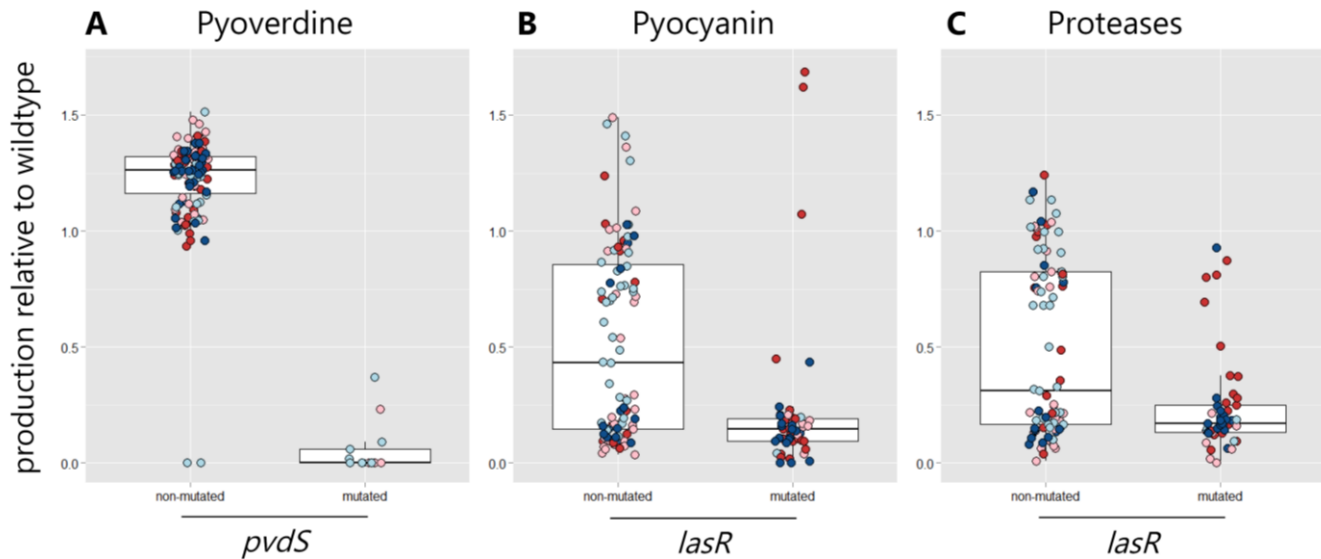

271

272 **Fig. 5. Mutations in key regulatory genes underlie the loss of virulence factor production.** Across the  
273 140 successfully sequenced clones, there was an accumulation of mutations in two regulatory genes (*pvdS*  
274 and *lasR*), which significantly correlated with the phenotypic changes observed for pyoverdine (A),  
275 pyocyanin (B) and protease (C) production (see Table S2). *pvdS* encodes the iron starvation sigma factor  
276 and all clones with mutations in this gene or its promoter showed significantly impaired pyoverdine  
277 production. *lasR* encodes the regulator of the Las-quorum-sensing system, which directly controls the  
278 expression of several proteases. All clones with *lasR* mutations showed reduced protease production. The  
279 LasR regulator also has downstream effects on the Rhl- and PQS quorum-sensing systems, which control  
280 pyocyanin production. Consistent with this view, most clones with *lasR* mutations (93.8 %) showed  
281 decreased pyocyanin production. Although the genotype-phenotype match was nearly perfect for mutated  
282 clones, a considerable amount of clones also showed altered phenotypes without mutations in these two  
283 regulators, suggesting that some of the phenotypic changes are caused by mutations in yet unidentified loci.

284 **DISCUSSION**

285 Using the opportunistic human pathogen *P. aeruginosa*, we show that bacterial virulence can  
286 evolve rapidly during experimental evolution, as a result of adaptation to both the host and the  
287 non-host environment. Overall, we found that *P. aeruginosa* evolved greatly reduced virulence in  
288 liquid unstructured environments, but remained highly virulent in spatially structured  
289 environments, regardless of whether its nematode host was present or absent. Phenotypic and  
290 genotypic screens provide strong evidence for positive selection on bacterial virulence factors and  
291 parallel adaptive evolution across independent replicates. Virulence reduction in unstructured  
292 environments without hosts was driven by a sharp decline in the production of the siderophore  
293 pyoverdine, and moderate decreases in protease and pyocyanin production. Conversely, virulence  
294 reduction in unstructured environment with hosts is explained by a stark decrease in protease and  
295 pyocyanin production, but not pyoverdine. Although the traits under selection seem to vary as a  
296 function of host presence, our findings are in strong support of evolutionary theory predicting that  
297 low spatial structure should select for reduced pathogenicity if virulence is mediated by secreted  
298 compounds such as toxins, proteases or siderophores [5,9]. The reason for this is that secreted  
299 virulence factors can be shared between cells, and can thus become exploitable by cheating  
300 mutants that no longer contribute to costly virulence factor production, yet still capitalize on those  
301 produced by others. The spread of such mutants is predicted to reduce overall virulence factor  
302 availability and to curb virulence, exactly as observed in our study.

303

304 Our results highlight how an in-depth mechanistic analysis of the traits under selection can deepen  
305 our understanding of virulence evolution. In the absence of our phenotypic and genetic trait  
306 analysis, we would be tempted to conclude that the presence of the host has no effect on virulence

307 evolution, and that evolutionary change is entirely driven by the external non-host environment  
308 (Fig. 2). Our mechanistic trait analysis proves such conclusions wrong for multiple reasons. First,  
309 we observed strong selection for pyoverdine-negative mutants only in the absence but not in the  
310 presence of the host (Fig. 2A). Pervasive selection against pyoverdine in unstructured, yet iron-  
311 limited medium, has previously been attributed to cheating [14]. Here, we show that the spread of  
312 pyoverdine-cheaters is apparently prevented in the presence of the host. One reason for this host-  
313 specific effect might be that the spatial structure inside hosts counteracts the selective advantage  
314 cheaters experience outside the host. Second, we found that the presence of the host had a  
315 significant effect on the strength of selection against pyocyanin and protease production (Fig.  
316 2B+C). We speculate that the presence of the host alters the reason for why these two virulence  
317 factors are selected against. In the absence of the host, neither pyocyanin nor proteases are required  
318 for growth, and their decline could be explained by selection against superfluous traits.  
319 Conversely, these two traits become beneficial in the presence of the host [38,40], such that  
320 selection against them could at least partially be explained by cheating. Third, we found evidence  
321 that the presence of the host selected for mutants with increased capacities to form biofilms (Fig.  
322 2D). Apart from increasing residency time within hosts, the shift from a planktonic to a more  
323 sessile lifestyle typically goes along with fundamental changes in gene expression patterns [48,49],  
324 which might in turn affect virulence. Finally, we found that virulence factors were also under  
325 selection in treatments where the overall virulence level did not change (i.e. in structured  
326 environments). In these environments, however, reduced production of one virulence factor (e.g.  
327 protease and pyocyanin) was often compensated by the upregulation of other virulence factors  
328 (e.g. pyoverdine and biofilm), resulting in a zero net change in virulence.  
329

330 A number of previous studies showed that when competition between virulence-factor producing  
331 and engineered non-producing bacteria is allowed for, then non-producing strains can often invade  
332 pathogen populations and thereby lower virulence [15,17,23,24]. While our work is in line with  
333 these findings, it makes several important novel contributions. First, our experiment started with  
334 fully virulent clonal wildtype bacteria, and any virulence-factor deficient mutants had to evolve  
335 from random mutations and invade pathogen populations from extreme rarity. Hence, our study  
336 proves that the predicted mutants indeed arise *de novo* and are promoted by natural selection in  
337 independent parallel replicates. Second, our results highlight that multiple social traits are  
338 simultaneously under selection, which contrasts with the work with engineered mutants, where  
339 either a specific siderophore or quorum-sensing system was deleted [15,17,23,24]. The fact that  
340 multiple differentially regulated virulence traits are under selection allowed us to identify additive  
341 and compensatory effects between traits, and to track the order of mutations. Third, our study  
342 design captured the cycling of an opportunistic pathogen through the host and the non-host  
343 environment, as it would occur under natural conditions [26,27]. This approach allowed us to  
344 discover accidental virulence effects that are purely driven by adaptation to the non-host  
345 environment. These non-host effects could not be quantified in previous studies, as the pathogens  
346 were directly transferred from one host generation to the next [17,23,24,50,51].

347  
348 At the genetic level, our findings closely relate to previous work that has identified *lasR* as a key  
349 target of evolution in the context of chronic *P. aeruginosa* infections in the cystic fibrosis lung  
350 [52–56], in non-cystic fibrosis bronchiectasis [57], as well as in acute infections [18,51]. While  
351 the ubiquitous appearance of *lasR*-mutants was often interpreted as a specific host adaptation, we  
352 show here that *lasR*-mutants frequently arise even in the absence of a host, indicating that

353 mutations in *lasR* are not a host-specific phenomenon. We propose three mutually non-exclusive  
354 explanations for the frequent occurrence and selective spread of *lasR*-mutants. First, we propose  
355 that the Las-quorum-sensing regulon might no longer be beneficial under many of the culturing  
356 conditions used in the laboratory, especially when bacteria are consistently grown at high cell  
357 densities. Mutations in *lasR* would thus reflect the first step in the degradation of this system.  
358 Alternatively, it is conceivable that quorum sensing remains beneficial, but that mutations in *lasR*  
359 represent the first step in the rewiring of the QS network in order to customize it to the novel  
360 conditions experienced in infections and laboratory cultures [58]. Finally, the invasion of *lasR*-  
361 mutants could be the result of cheating, where these signal blind mutants still contribute to signal  
362 production, but no longer respond to it and thus refrain from producing the QS-controlled public  
363 goods [36,59]. We have argued above that, although *lasR* mutants were favoured in all our  
364 treatments, the presence of the host might change the selection pressure and underlying reason for  
365 why these mutants are selected for. More generally, our observations of high strain diversification  
366 during experimental evolution, and the co-existence of multiple different phenotypes and  
367 genotypes within each replicate, are reminiscent of patterns found in chronic *P. aeruginosa*  
368 infections in cystic fibrosis lungs [19,52,53,60]. While this diversity might be transient in some  
369 cases, it highlights that an initially clonal infection can give rise to a diverse community, with  
370 multiple strains competing with each other within the host, as it was observed in CF lung  
371 communities [61,62].

372  
373 In conclusion, our study demonstrates that there is rapid and parallel virulence evolution in  
374 populations of the opportunist *P. aeruginosa*, and that secreted virulence factors are the main target  
375 of selection. While low spatial structure of the environment generally selected for lower virulence

376 regardless of whether hosts were present or not, the virulence traits under selection and the strength  
377 of selection were host dependent. This greatly contributes to our knowledge on how bacterial  
378 opportunistic pathogens adapt to the variable environments they occupy, and how this affects their  
379 virulence [26,27]. Our work also highlights that linking virulence evolution to selection inside and  
380 outside of the host is key to predict evolutionary trajectories in opportunistic pathogens. Such  
381 insights might offer simple approaches of how to manage infections in these clinically highly  
382 important pathogens [60,63–65], for example through the disruption of spatial structure in chronic  
383 infections, which could, according to our findings, steer pathogen evolution towards lower  
384 virulence.

## 385 MATERIALS AND METHODS

### 386 Strains and growth conditions

387 We used *Pseudomonas aeruginosa* wildtype strain PAO1 (ATCC 15692) constitutively expressing  
388 GFP (PAO1-*gfp*) for experimental evolution. The siderophore deficient mutant PAO1 $\Delta$ *pvdD-gfp*,  
389 the quorum-sensing deficient mutants PAO1 $\Delta$ *rhIR* and PAO1 $\Delta$ *lasR* (S. Diggle, Georgia Institute  
390 of Technology, USA), and the biofilm deficient mutant MPAO1 $\Delta$ *pelA* $\Delta$ *pslA* (M. Toyofuku,  
391 University of Zurich, Switzerland) were used as negative controls for phenotype screening. For  
392 overnight pre-culturing, we routinely used Luria Bertani (LB) medium and incubated the bacteria  
393 under shaking conditions (190 rpm) for 18-20 h, and optical density (OD) of bacterial cultures was  
394 determined in a Tecan Infinite M-200 plate reader (Tecan Group Ltd., Switzerland) at a wavelength  
395 of 600 nm, unless indicated otherwise. All experiments in this study were conducted at 25°C,  
396 except for the pre-culturing of the ancestral wildtype strain before the start of the experimental  
397 evolution (see below). To generate iron-limited nutrient medium (RDM-Ch) suitable for bacterial  
398 and nematode co-culturing, we supplied low-phosphate NGM (nematode growth medium; 2.5 gL<sup>-1</sup>  
399 BactoPeptone, 3 gL<sup>-1</sup> NaCl, 5 mgL<sup>-1</sup> Cholesterol, 25 mM MES buffer pH = 6.0, 1mM MgSO<sub>4</sub>,  
400 1mM CaCl<sub>2</sub>; adapted from [30] with the iron chelator 2,2'-Bipyridyl at a final concentration of  
401 200  $\mu$ M. For agar plates, liquid media was supplemented with 1.5% (m/V) agar. All chemicals  
402 were acquired from Sigma-Aldrich, Switzerland. *Caenorhabditis elegans* N2 wildtype nematodes  
403 were acquired from the Caenorhabditis Genetics Center (CGC). General nematode maintenance  
404 and generation of age-synchronized L4 nematodes was performed according to standard protocols  
405 [66].

406 **Experimental evolution**

407 Experimental evolution was conducted with a clonal population of PAO1-*gfp* bacteria as a starting  
408 point. For each of the four experimental treatments (agar plates with and without host, liquid  
409 culture with and without host), eight replicate lines were evolved independently. Throughout the  
410 experimental evolution, *C. elegans* was not allowed to co-evolve. Instead, fresh age-synchronized  
411 L4 stage nematodes were supplied at each transfer step. Since *P. aeruginosa* is highly virulent  
412 towards *C. elegans*, the vast majority of worms were dead before each transfer step. Each  
413 individual culture was visually checked for egg or L1 larvae development and we never observed  
414 any live larvae. We can therefore assume that the nematodes did not successfully reproduce during  
415 experimental evolution.

416

417 At the start of the experimental evolution, overnight cultures of PAO1-*gfp* were grown under  
418 shaken conditions (190-200 rpm) at 37°C for 18 h, washed with NaCl (0.85%) and adjusted to an  
419 OD600 of 1.0. After this point, all steps throughout the experimental evolution were conducted at  
420 25°C. For evolution on agar plates and for each replicate line, 50 µL of cell suspension were spread  
421 onto a small RDM-Ch agar plate (diameter 60 mm). Approximately 100 age-synchronized L4  
422 stage *C. elegans* nematodes were then added to each plate in the treatment “agar plate with host”,  
423 and all plates were incubated for 48 h before the first transfer. For evolution in liquid cultures, the  
424 same OD-adjusted bacterial suspensions were diluted 10<sup>-4</sup> into 5 mL of liquid RDM-Ch in 15 mL  
425 culture tubes. Approximately 2500 age-synchronized L4 stage *C. elegans* nematodes were then  
426 added to each tube for the treatment “liquid culture with host”, and all tubes were incubated for  
427 48 h under “rolling” conditions (160 rpm) in a horizontal position to avoid clumping of the worms.  
428 Transfers of bacteria to fresh nutrient medium and, if applicable, addition of fresh nematodes to



429 the samples were conducted every 48 h and executed as follows. For all agar plates, bacteria were  
430 replica-plated to a fresh RDM-Ch plate, using a custom made replica tool covered in sterilized  
431 velvet. In the treatment “agar plate with host”, the plates containing the nematodes from the  
432 previous round were then rinsed off the plate with sterile NaCl (0.85%), washed thoroughly to  
433 avoid additional transfer of bacteria, and 10% of the nematode suspension was transferred to the  
434 new plate. Since *P. aeruginosa* is highly virulent towards *C. elegans*, the transferred worms were  
435 carcasses. A fresh batch of ~100 synchronized L4 stage nematodes was then added to the plates.  
436 For the “liquid culture without host” treatment, 50  $\mu$ L of the culture was used to inoculate 4.95 mL  
437 of fresh RDM-Ch medium. For the “liquid culture with host” treatment, culture tubes were  
438 centrifuged slowly (~200 g, 5 min) to pellet the nematodes, and 50  $\mu$ L of the supernatant (still  
439 containing the bacteria) was used to inoculate 4.95 mL of fresh RDM-Ch medium. The pelleted  
440 nematodes were then washed thoroughly with sterile NaCl (0.85%), and 10% of the nematode  
441 suspension was transferred to the new culture tube. Analogous to the agar treatment, most  
442 transferred worms were carcasses due to the high virulence levels of *P. aeruginosa*. A fresh batch  
443 of ~2500 synchronized L4 nematodes was then added to the tubes.

444  
445 The number of viable bacteria transferred through replica-plating corresponded approximately to  
446 a 1:100 dilution, and was therefore equivalent to the dilution achieved in the liquid cultures. In  
447 total, 30 transfers were conducted, corresponding to approximately 200 generations of bacterial  
448 evolution. At the end of the experimental evolution, evolved populations were frozen for further  
449 analysis as follows. For the two agar plates treatments, the bacterial lawn was washed off with  
450 sterile NaCl (0.85%), mixed vigorously, diluted  $10^{-3}$  into 3 mL of liquid LB medium in 6-well  
451 plates, and incubated under shaken conditions (100 rpm) for 18 h. For the “liquid culture with

452 host” treatment, culture tubes were first centrifuged slowly (~200 g, 5 min) to pellet the nematodes.  
453 Then, 25  $\mu$ L of the supernatant (containing bacteria) was used to inoculate 2.475 mL liquid LB  
454 medium in 6-well plates. For the “liquid culture without host” treatment, 25  $\mu$ L of the bacterial  
455 culture was used to inoculate 2.475 mL liquid LB medium in 6-well plates. All plates were then  
456 incubated under shaken conditions (100 rpm) for 18 h. Finally, 900  $\mu$ L of each well was mixed  
457 1:1 with sterile glycerol (85%) and frozen at -80°C in separate cryotubes.

458

#### 459 **Killing assays for virulence measurements**

460 Population level virulence was assessed in two different killing assays, namely in liquid culture  
461 and on agar plates, representing the two different environments the different bacterial populations  
462 evolved in. Populations were separately tested both in the environment they evolved in  
463 (populations evolved on agar plates tested on agar plates, and populations evolved in liquid  
464 culture tested in liquid culture), and in the respective reciprocal environment (populations  
465 evolved in liquid culture tested on agar plates, and vice versa). All killing assays were conducted  
466 at 25°C.

467

468 For killing assays in liquid culture, evolved bacterial populations and the ancestral wildtype strain  
469 were re-grown from freezer stocks in LB medium overnight, washed with sterile NaCl (0.85%),  
470 adjusted to OD<sub>600</sub>=1.0 and diluted 10<sup>-4</sup> into 5 mL of liquid RDM-Ch medium in a 15 mL culture  
471 tube. Three replicate tubes were inoculated per tested population. After an incubation period of  
472 48 h (shaken conditions, 160-165 rpm), the OD<sub>600</sub> was measured and cells were pelleted through  
473 centrifugation. A volume  $\leq$  500  $\mu$ L of the supernatant was removed, corresponding to the volume  
474 containing ~2500 synchronized L4 nematodes that were subsequently added. Culture tubes were

475 then incubated for 48 h under “rolling” conditions at 160 rpm in a horizontal position to avoid  
476 clumping of the worms. At 24 h and 48 h after adding the nematodes, the level of virulence was  
477 determined by counting the fraction of dead worms. Small aliquots were taken from the main  
478 culture and dropped onto an NGM plate. After a short drying period, nematodes were prodded  
479 repeatedly with a metal rod and counted as dead if they did not show any signs of movement. Dead  
480 worms were immediately removed to avoid double counting.

481  
482 For killing assays on agar plates, evolved bacterial populations and the ancestral wildtype strain  
483 were re-grown from freezer stock in LB medium overnight, washed with sterile NaCl (0.85%),  
484 adjusted to OD<sub>600</sub>=1.0 and 50 μL were spread on RDM-Ch agar plates. Six replicate plates were  
485 inoculated per tested population. Plates were incubated for 48 h, and an aliquot of synchronized  
486 L4 nematodes suspended in liquid was then added to the plates. The nematodes had been  
487 previously starved on empty NGM plates for 24 h. The starting number of nematodes ranged from  
488 20 to 60 worms per plate and was immediately determined by manual counting. Plates were then  
489 incubated further and at 24 h and 48 h after adding the nematodes, the level of virulence was  
490 determined by counting the number of dead worms on the plates, as described for the killing assay  
491 in liquid culture. For both killing assays, each individual liquid culture and plate was visually  
492 checked for egg or L1 larvae development and we never observed any live larvae. We can therefore  
493 assume that the nematodes did not successfully reproduce during these experiments.

494

#### 495 **Isolation of single clones**

496 To isolate single clones, evolved bacterial populations were re-grown from freezer stock in 3 mL  
497 LB medium for 20 h (160 rpm) and adjusted to OD<sub>600</sub>=1.0. Then, 200 μL of 10<sup>-6</sup> and 10<sup>-7</sup> dilutions

498 were spread on large LB agar plates (diameter 150 mm), and plates were incubated at room  
499 temperature (~20-25°C) for 48 h. Twenty colonies were then randomly picked for each population  
500 and inoculated into 100 µL LB medium in a 96-well plate. Plates were incubated for 24 h under  
501 shaken conditions (165 rpm) before adding 100 µL sterile glycerol (85%) to each well, sealing the  
502 plates with adhesive foil and freezing at -80°C. A total number of 640 clones was isolated this  
503 way, and each was subjected to four different phenotypic screens for virulence factor production.

504

#### 505 **Phenotypic screen for virulence factor production**

506 **Pyoverdine production.** Single clones were re-grown from freezer stocks in 200 µL LB medium  
507 for 20 h (165 rpm) in 96-well plates. Then, for each well, cultures were first diluted  $10^{-2}$  in NaCl  
508 (0.85%) and then  $10^{-2}$  into liquid RDM-Ch to a final volume of 200 µL in a 96-well plate. Plates  
509 were then incubated for 24 h under shaken conditions (165 rpm) and OD600 and pyoverdine-  
510 specific fluorescence (emission 400 nm, excitation 460 nm) were measured in a plate reader  
511 through single endpoint measurements. Multiple wells inoculated with the ancestral wildtype as  
512 well as blank medium controls were included in every plate. Additionally, the pyoverdine  
513 knockout mutant PAO1- $\Delta pvdD$ -*gfp* was included as a negative control for pyoverdine  
514 fluorescence.

515

516 **Pyocyanin production.** Single clones were re-grown from freezer stocks in 200 µL LB medium  
517 for 20 h (165 rpm) in 96-well plates. Then, for each well, cultures were first diluted  $10^{-2}$  in NaCl  
518 (0.85%) and then  $10^{-2}$  into liquid LB to a final volume of 1 mL in 24-well plates. Plates were then  
519 incubated for 24 h under shaken conditions (165 rpm). The well content was then transferred to  
520 1.5 mL reaction tubes, vortexed thoroughly, and centrifuged to pellet bacterial cells. From each

521 tube, three aliquots of 150  $\mu\text{L}$  of the cell-free supernatant were then transferred to 96-well plates,  
522 and pyocyanin was quantified by measuring OD at 691 nm in a plate reader. Multiple wells  
523 inoculated with the ancestral wildtype as well as blank medium controls were included in every  
524 plate. Additionally, the Rhl-quorum-sensing deficient knockout mutant PAO1- $\Delta rhlR$  was included  
525 as a negative control for pyocyanin production.

526  
527 **Protease production.** Single clones were re-grown from freezer stocks in 200  $\mu\text{L}$  LB medium for  
528 20 h (165 rpm) in 96-well plates. Then, for each well, 1  $\mu\text{L}$  of bacterial culture was dropped into  
529 a single well of a 24-well plate filled with skim milk agar (5  $\text{gL}^{-1}$  LB, 4% (m/V) skim milk powder,  
530 15  $\text{gL}^{-1}$  agar) and plates were incubated for 20 h. Pictures of the plates were then taken with a  
531 standard digital camera and analyzed with the Image Analysis Software *ImageJ* [67]. The diameter  
532 of the clear halo around the bacterial colony and the diameter of the colony itself was measured,  
533 and protease production was calculated using the following formula:

534 
$$\text{relative protease production} = \frac{(\text{diameter}(\text{halo}) - \text{diameter}(\text{colony}))}{\text{diameter}(\text{colony})}.$$

535 Multiple wells inoculated with the ancestral wildtype as well as blank medium controls were  
536 included in every plate. Additionally, the Las-quorum-sensing deficient knockout mutant PAO1-  
537  $\Delta lasR$  was included as a negative control for protease production.

538  
539 **Biofilm production.** Single clones were re-grown from freezer stocks in 200  $\mu\text{L}$  LB medium for  
540 20 h (165 rpm) in 96-well plates. Then, for each well, the air liquid biofilm was manually removed  
541 from the surface with a sterile pipette tip. Cultures were then diluted  $10^{-2}$  into 100  $\mu\text{L}$  LB medium  
542 in a 96-well round bottom plate (No. 83.3925.500, Sarstedt, Germany) and incubated under static  
543 conditions for 24 h. After removal of the air liquid biofilm, the growth medium containing the

544 planktonic cells was transferred to a fresh flat-bottom 96-well plate and OD was measured at  
545 550 nm in a plate reader. In the plate containing the cells attached to the plastic surface, 100  $\mu$ L of  
546 crystal violet (0.1%) was added to each well and plates were incubated at room temperature for  
547 30 min. Then, the wells were carefully washed several times with ddH<sub>2</sub>O, left to dry at room  
548 temperature for 30 min, and 120  $\mu$ L DMSO was added to each well before a final incubation step  
549 of 20 min at room temperature. Finally, OD was measured at 570 nm in a plate reader, and the  
550 production of surface-attached biofilms was quantified by calculating the “Biofilm Index”  
551 (OD<sub>570</sub>/OD<sub>550</sub>) for each well [68]. Multiple wells inoculated with the ancestral wildtype as well  
552 as blank medium controls were included in every plate. Additionally, the knockout mutant  
553 MPAO1- $\Delta pelA$ - $\Delta pslA$  was included as a negative control for biofilm production.

554

555 **Calculation of the “virulence factor index”.** We defined a virulence factor index  $v = \sum r_i / n$ ,  
556 where  $r_i$ -values represent the average virulence factor production scaled relative to the ancestral  
557 wildtype for the  $i$ -th virulence factor ( $i =$  pyoverdine, pyocyanin, proteases, biofilm), and  $n$  is the  
558 total number of virulence factors. A clone with wildtype production levels for all four virulence  
559 factors measured would have a virulence index of  $\sim 1$ , whereas a clone with mostly lowered or  
560 absent production would have a virulence index closer to 0. For statistical analyses and the  
561 generation of Fig. 3B and Fig. S3, we used the average virulence index across clones for each  
562 population.

563 **Whole genome sequencing and variant calling**

564

565 **Selection of clones to sequence.** To select populations from which to select clones for sequencing,  
566 we first chose all populations that showed a decrease in virulence, and then added randomly chosen  
567 populations to cover all four treatments in a balanced way (four sequenced populations for each  
568 treatment), leading to a total of 16 selected evolved populations. From these, we selected 9 clones  
569 per population according to the following scheme: first, we tried to get at least one clone that  
570 showed no phenotypic differences to the ancestral wildtype with regards to pyoverdine and  
571 pyocyanin production. Then, we tried to get clones with a marked decrease in pyoverdine and/or  
572 pyocyanin production. Finally, we filled up the list with randomly chosen clones.

573

574 **Genomic DNA isolation.** Clones were re-grown from freezer stocks in 3 mL LB medium in 15 mL  
575 culture tubes at 190 rpm for 20-24 h. Genomic DNA was then extracted from 1 mL of culture  
576 using the *GenElute™ Bacterial Genomic DNA Kit* (Sigma-Aldrich, Switzerland) according to the  
577 manufacturer's instructions. At the final step of the isolation protocol, the DNA was eluted in  
578 TRIS-HCl without the addition of EDTA to avoid interference with sequencing library preparation.  
579 DNA concentration was quantified using the *QuantiFluor® dsDNA System* (Promega,  
580 Switzerland) according to the manufacturer's instructions, and diluted to a concentration of  
581 10 ng/μL for use in subsequent library preparation.

582

583 **Preparation of sequencing library and whole genome sequencing.** Sequencing libraries were  
584 constructed using the Nextera XT Kit (Illumina, USA). Briefly, 0.8 ng of gDNA per sample was  
585 tagged at 55 °C for 10 min. Libraries were dual-indexed and amplified in the subsequent library

586 PCR. Sequencing libraries were cleaned up using cleanNA SPRI beads (GC biotech, Netherlands)  
587 according to the manufacturer's protocol. Next, DNA concentration was quantified using the  
588 *QuantiFluor® dsDNA System* (Promega, Germany) and equal amounts of library per sample  
589 pooled. Finally, the molarity of the library pool was determined using the *dsDNA High Sensitivity*  
590 *Assay* for the *Bioanalyzer 2100* (Agilent Technologies, Germany). Sequencing was performed  
591 2x150 bp by Microsynth (Balgach, Switzerland) on a NextSeq500 (Illumina, USA).

592  
593 **Variant calling.** Demultiplexed reads were aligned to the *P. aeruginosa* PAO1 reference genome  
594 using bowtie2 in local-sensitive mode [69]. PCR duplicates were removed using “picard” tools  
595 (<https://broadinstitute.github.io/picard/>). Variants were called using “samtools” (v0.1.19),  
596 “mpileup” and “bcftools” [70]. Variants were filtered with default parameters using “samtools”  
597 and “vcfutils”. Variant effects were predicted using SnpEff (version 4.1d) [71]. Annotated variant  
598 calls were only retained if more than 80% of reads contained the alternate base and if quality scores  
599 (Phred-scaled probability of sample reads being homozygous reference) were at least 50 (i.e.  $P \leq$   
600  $10E-5$ ). All variants already occurring in the ancestral wildtype strain were discarded for analysis  
601 of the evolved clones. Of the 144 sequenced clones, three had to be discarded before analysis due  
602 to low coverage, and one for likely being a mixture of two different genotypes due to  
603 contamination. Read alignments covering genes with multiple variants (either in the same or  
604 different clones) were manually inspected to remove spurious calls in 19 loci (PA2139-PA2140,  
605 PA4875-PA4876, PA3503-PA3504, PA2127-PA2128, PA0604-PA0605, PA0366-PA0367,  
606 PA0148-PA0149, PA5024, PA4526-PA4527, PA3969a-PA3970, PA1352-PA1353, PA4280.2-  
607 PA4280.3, PA2000-PA2001, PA1234-PA1235, PA4838-PA4839, PA2373, PA2232, PA2296,  
608 and PA2492).



609 **Analysis of parallelism and order of mutations.**

610 We based our calculation of the relative rates of nonsynonymous to synonymous SNPs (dN/dS)  
611 on a 25% chance that a random substitution mutation would be synonymous. In the case of the  
612 *P. aeruginosa* genomes we analyzed here, out of a total of 16,779,042 possible SNP mutations  
613 within the genes (5,593,014 bp of coding sequences, multiplied by three possible mutations in each  
614 position), only 4,237,247 SNP mutations would cause a synonymous change.

615 To infer the order of mutations, we compared the mutations that were called across strains from  
616 the 16 populations, and identified 18 loci (i.e. genes or an intergenic regions) that were mutated in  
617 at least two populations. The Supplementary Table S3 lists all mutations in the 18 loci that were  
618 mutated in at least two populations, and also lists mutations in *pilE pilG, pilM, pilN, pilO, pilU,*  
619 *pilW,* and *pilZ* that were only mutated in a single population. To order two given mutations in a  
620 given strain, we checked whether other strains from the same population carried only one of these  
621 two mutations, as this would indicate that the other mutation appeared second in the same strain.  
622 We observed no mutational patterns inconsistent with this model.

623

624 **Statistical Analysis**

625 We used linear models and linear mixed models for statistical analyses using R 3.2.2 [72]. In cases  
626 where data distributions did not meet the assumptions of linear models, we performed non-  
627 parametric Wilcoxon rank sum tests. To test whether evolved virulence factor production in single  
628 clones depended on the environment they evolved in, we used Markov-chain Monte Carlo  
629 generalized linear mixed models (MCMCglmm) in a Bayesian framework [73]. In this context, *p*  
630 represents the posterior probability associated with a fixed effect, and as such is not a “classical”  
631 frequentist p-value, but provides the same kind of information. For all results analyzed with

632 MCMCglmm, we ran the analyses at least five consecutive times to confirm that p-values were  
633 consistently  $< 0.05$ . Principal component analysis (PCA) was conducted using the ‘FactoMineR’  
634 [74] and ‘factoextra’ packages (<https://CRAN.R-project.org/package=factoextra>). Detailed  
635 information on the results of all statistical tests associated with this publication can be found in  
636 Supplementary Table S2.

637 **ACKNOWLEDGEMENTS**

638 We thank Swati Parekh for assistance in genomic analysis, Isa Moreno for help with the nematode  
639 killing assays, Ruben Dezeure for statistical advice, and Stu West and Sam Brown for comments  
640 on the manuscript.

641

642 **AUTHOR CONTRIBUTIONS**

643 E.G. and R.K. planned the experiments. E.G. carried out the experiments and conducted statistical  
644 analysis. C.Z. constructed the sequencing libraries and carried out variant calling. R.L.M. analysed  
645 the variants. E.G. and R.K. analyzed and interpreted the data. All authors contributed to writing  
646 the manuscript.

647

648 **FUNDING DISCLOSURE**

649 This work was funded by the Swiss National Science Foundation (grant no. PP00P3\_165835), the  
650 ERC (grant no. 681295), and the Forschungskredit of the University of Zurich (no. FK-15-084).  
651 RLM is supported by the Danish National Research Foundation (grant no. 126). *C. elegans* strains  
652 were provided by the CGC, which is funded by NIH Office of Research Infrastructure Programs  
653 (P40 OD010440).

654

655 **DATA AVAILABILITY**

656 All sequencing data is available at the European Nucleotide Archive (accession number  
657 PRJEB23190). We will deposit all raw data on Dryad and will provide all respective accession  
658 numbers at the revision stage.

659 **REFERENCES**

- 660 1. Cressler CE, McLeod D V., Rozins C, Van den Hoogen J, Day T. The adaptive evolution  
661 of virulence: a review of theoretical predictions and empirical tests. *Parasitology*. 2016;  
662 915–930.
- 663 2. Diard M, Hardt W-D. Evolution of bacterial virulence. *FEMS Microbiol Rev*. 2017; 679–  
664 697.
- 665 3. Frank SA. Models of Parasite Virulence. *Q Rev Biol*. 1996; 37–78.
- 666 4. Wild G, Gardner A, West SA. Adaptation and the evolution of parasite virulence in a  
667 connected world. *Nature*. 2009; 983–6.
- 668 5. Buckling A, Brockhurst MA. Kin selection and the evolution of virulence. *Heredity*. 2008;  
669 484–8.
- 670 6. Lion S. Multiple infections, kin selection and the evolutionary epidemiology of parasite  
671 traits. *J Evol Biol*. 2013; 2107–2122.
- 672 7. Alizon S, de Roode JC, Michalakis Y. Multiple infections and the evolution of virulence.  
673 *Ecol Lett*. 2013; 556–567.
- 674 8. de Roode JC, Pansini R, Cheesman SJ, Helinski MEH, Huijben S, Wargo AR, et al.  
675 Virulence and competitive ability in genetically diverse malaria infections. *Proc Natl Acad  
676 Sci U S A*. 2005; 7624–8.
- 677 9. West SA, Buckling A. Cooperation, virulence and siderophore production in bacterial  
678 parasites. *Proc Biol Sci*. 2003; 37–44.
- 679 10. Alizon S, Lion S. Within-host parasite cooperation and the evolution of virulence. *Proc Biol  
680 Sci*. 2011; 3738–3747.
- 681 11. West SA, Diggle SP, Buckling A, Gardner A, Griffin AS. The Social Lives of Microbes.  
682 *Annu Rev Ecol Evol Syst*. 2007; 53–77.
- 683 12. Brown SP, Hochberg ME, Grenfell BT. Does multiple infection select for raised virulence?  
684 *Trends Microbiol*. 2002; 401–5.
- 685 13. Buckling A, Harrison F, Vos M, Brockhurst MA, Gardner A, West SA, et al. Siderophore-  
686 mediated cooperation and virulence in *Pseudomonas aeruginosa*. *FEMS Microbiol Ecol*.  
687 2007; 135–141.
- 688 14. Kümmerli R, Griffin AS, West SA, Buckling A, Harrison F. Viscous medium promotes  
689 cooperation in the pathogenic bacterium *Pseudomonas aeruginosa*. *Proc Biol Sci*. 2009;

- 690 3531–8.
- 691 15. Harrison F, Browning LE, Vos M, Buckling A. Cooperation and virulence in acute  
692 *Pseudomonas aeruginosa* infections. *BMC Biol.* 2006; 21.
- 693 16. Raymond B, West SA, Griffin AS, Bonsall MB. The dynamics of cooperative bacterial  
694 virulence in the field. *Science.* 2012; 85–8.
- 695 17. Rumbaugh KP, Diggle SP, Watters CM, Ross-Gillespie A, Griffin AS, West SA. Quorum  
696 Sensing and the Social Evolution of Bacterial Virulence. *Curr Biol.* 2009; 341–345.
- 697 18. Köhler T, Buckling A, van Delden C. Cooperation and virulence of clinical *Pseudomonas*  
698 *aeruginosa* populations. *Proc Natl Acad Sci U S A.* 2009; 6339–44.
- 699 19. Andersen SB, Marvig RL, Molin S, Krogh Johansen H, Griffin AS. Long-term social  
700 dynamics drive loss of function in pathogenic bacteria. *Proc Natl Acad Sci.* 2015; 10756–  
701 10761.
- 702 20. Boots M, Meador M. Local interactions select for lower pathogen infectivity. *Science.* 2007;  
703 1284–6.
- 704 21. Kerr B, Neuhauser C, Bohannan BJM, Dean AM. Local migration promotes competitive  
705 restraint in a host-pathogen “tragedy of the commons”. *Nature.* 2006; 75–8.
- 706 22. Leggett HC, Wild G, West SA, Buckling A, Leggett HC. Fast-killing parasites can be  
707 favoured in spatially structured populations. *Philos Trans R Soc Lond B Biol Sci.* 2017; 1–  
708 5.
- 709 23. Rumbaugh KP, Trivedi U, Watters C, Burton-Chellew MN, Diggle SP, West SA. Kin  
710 selection, quorum sensing and virulence in pathogenic bacteria. *Proc Biol Sci.* 2012; 3584–  
711 3588.
- 712 24. Pollitt EJG, West SA, Crusz S a, Burton-Chellew MN, Diggle SP. Cooperation, Quorum  
713 Sensing, and Evolution of Virulence in *Staphylococcus aureus*. *Infect Immun.* 2014; 1045–  
714 51.
- 715 25. Leggett HC, Cornwallis CK, Buckling A, West SA. Growth rate, transmission mode and  
716 virulence in human pathogens. *Philos Trans R Soc B Biol Sci.* 2017; 20160094.
- 717 26. Brown SP, Cornforth DM, Mideo N. Evolution of virulence in opportunistic pathogens:  
718 generalism, plasticity, and control. *Trends Microbiol.* 2012; 336–42.
- 719 27. Brown NF, Wickham ME, Coombes BK, Finlay BB. Crossing the line: Selection and  
720 evolution of virulence traits. *PLoS Pathog.* 2006; 346–353.

- 721 28. Mikonranta L, Mappes J, Laakso J, Ketola T. Within-host evolution decreases virulence in  
722 an opportunistic bacterial pathogen. *BMC Evol Biol.* 2015; 165.
- 723 29. Tan MW, Mahajan-Miklos S, Ausubel FM. Killing of *Caenorhabditis elegans* by  
724 *Pseudomonas aeruginosa* used to model mammalian bacterial pathogenesis. *Proc Natl Acad*  
725 *Sci U S A.* 1999; 715–20.
- 726 30. Zaborin A, Romanowski K, Gerdes S, Holbrook C, Lepine F, Long J, et al. Red death in  
727 *Caenorhabditis elegans* caused by *Pseudomonas aeruginosa* PAO1. *Proc Natl Acad Sci U S*  
728 *A.* 2009; 6327–32.
- 729 31. de Abreu P, Farias P, Paiva G, Almeida A, Morais P. Persistence of microbial communities  
730 including *Pseudomonas aeruginosa* in a hospital environment: a potential health hazard.  
731 *BMC Microbiol.* 2014; 118.
- 732 32. Green S, Schroth M, Cho J. Agricultural plants and soil as a reservoir for *Pseudomonas*  
733 *aeruginosa*. *Appl Microbiol.* 1974; 987–991.
- 734 33. Samuel BS, Rowedder H, Braendle C, Félix M-A, Ruvkun G. *Caenorhabditis elegans*  
735 responses to bacteria from its natural habitats. *Proc Natl Acad Sci.* 2016; E3941–E3949.
- 736 34. Schalk IJ, Guillon L. Pyoverdine biosynthesis and secretion in *Pseudomonas aeruginosa*:  
737 implications for metal homeostasis. *Environ Microbiol.* 2013; 1661–73.
- 738 35. Lau GW, Hasset DJ, Ran H, Kong F. The role of pyocyanin in *Pseudomonas aeruginosa*  
739 infection. *Trends Mol Med.* 2004; 599–606.
- 740 36. Diggle SP, Griffin AS, Campbell GS, West SA. Cooperation and conflict in quorum-sensing  
741 bacterial populations. *Nature.* 2007; 411–414.
- 742 37. van Tilburg Bernardes E, Charron-Mazenod L, Reading DJ, Reckseidler-Zenteno SL,  
743 Lewenza S. Exopolysaccharide-repressing small molecules with antibiofilm and  
744 antivirulence activity against *Pseudomonas aeruginosa*. *Antimicrob Agents Chemother.*  
745 2017; AAC.01997-16.
- 746 38. Cezairliyan B, Vinayavekhin N, Grenfell-Lee D, Yuen GJ, Saghatelian A, Ausubel FM.  
747 Identification of *Pseudomonas aeruginosa* phenazines that kill *Caenorhabditis elegans*.  
748 *PLoS Pathog.* 2013.
- 749 39. Van Tilburg Bernardes E, Charron-Mazenod L, Reading DJ, Reckseidler-Zenteno SL,  
750 Lewenza S. Exopolysaccharide-repressing small molecules with antibiofilm and  
751 antivirulence activity against *Pseudomonas aeruginosa*. *Antimicrob Agents Chemother.*

- 2017; AAC.01997-16.
- 752
- 753 40. Zhu J, Cai X, Harris TL, Gooyit M, Wood M, Lardy M, et al. Disarming *Pseudomonas*
- 754 *aeruginosa* Virulence Factor LasB by Leveraging a *Caenorhabditis elegans* Infection
- 755 Model. *Chem Biol.* 2015; 483–491.
- 756 41. Dumas Z, Kümmerli R. Cost of cooperation rules selection for cheats in bacterial
- 757 metapopulations. *J Evol Biol.* 2012; 473–484.
- 758 42. Kümmerli R, Santorelli LA, Granato ET, Dumas Z, Dobay A, Griffin AS, et al. Co-
- 759 evolutionary dynamics between public good producers and cheats in the bacterium
- 760 *Pseudomonas aeruginosa*. *J Evol Biol.* 2015; 2264–74.
- 761 43. Ross-Gillespie A, Weigert M, Brown SP, Kümmerli R. Gallium-mediated siderophore
- 762 quenching as an evolutionarily robust antibacterial treatment. *Evol Med Public Heal.* 2014;
- 763 18–29.
- 764 44. Bonchi C, Frangipani E, Imperi F, Visca P. Pyoverdine and proteases affect the response of
- 765 *pseudomonas aeruginosa* to gallium in human serum. *Antimicrob Agents Chemother.* 2015;
- 766 5641–5646.
- 767 45. Lim WS, Phang KKS, Tan AHM, Li SFY, Ow DSW. Small colony variants and single
- 768 nucleotide variations in Pf1 region of Pb1 phage-resistant *Pseudomonas aeruginosa*. *Front*
- 769 *Microbiol.* 2016; 1–14.
- 770 46. Lee J, Zhang L. The hierarchy quorum sensing network in *Pseudomonas aeruginosa*. *Protein*
- 771 *Cell.* 2014; 26–41.
- 772 47. Barken KB, Pamp SJ, Yang L, Gjermansen M, Bertrand JJ, Klausen M, et al. Roles of type
- 773 IV pili, flagellum-mediated motility and extracellular DNA in the formation of mature
- 774 multicellular structures in *Pseudomonas aeruginosa* biofilms. *Environ Microbiol.* 2008;
- 775 2331–2343.
- 776 48. Sauer K, Camper AK, Ehrlich GD, Costerton JW, Davies DG. *Pseudomonas aeruginosa*. *J*
- 777 *Bacteriol.* 2002; 1140–1154.
- 778 49. Rollet C, Gal L, Guzzo J. Biofilm-detached cells, a transition from a sessile to a planktonic
- 779 phenotype: A comparative study of adhesion and physiological characteristics in
- 780 *pseudomonas aeruginosa*. *FEMS Microbiol Lett.* 2009; 135–142.
- 781 50. Racey D, Inglis RF, Harrison F, Oliver A, Buckling A. The effect of elevated mutation rates
- 782 on the evolution of cooperation and virulence of *Pseudomonas aeruginosa*. *Evolution.* 2010;

- 783 515–21.
- 784 51. Jansen G, Crummenerl LL, Gilbert F, Mohr T, Pfefferkorn R, Thänert R, et al. Evolutionary  
785 transition from pathogenicity to commensalism: Global regulator mutations mediate fitness  
786 gains through virulence attenuation. *Mol Biol Evol.* 2015; 2883–2896.
- 787 52. Marvig RL, Sommer LM, Molin S, Johansen HK. Convergent evolution and adaptation of  
788 *Pseudomonas aeruginosa* within patients with cystic fibrosis. *Nat Genet.* 2015; 57–65.
- 789 53. Winstanley C, O’Brien S, Brockhurst MA. *Pseudomonas aeruginosa* Evolutionary  
790 Adaptation and Diversification in Cystic Fibrosis Chronic Lung Infections. *Trends*  
791 *Microbiol.* 2016; 327–337.
- 792 54. Hoffman LR, Kulasekara HD, Emerson J, Houston LS, Burns JL, Ramsey BW, et al.  
793 *Pseudomonas aeruginosa* lasR mutants are associated with cystic fibrosis lung disease  
794 progression. *J Cyst Fibros.* 2009; 66–70.
- 795 55. Yang L, Jelsbak L, Marvig RL, Damkiær S, Workman CT, Rau MH, et al. Evolutionary  
796 dynamics of bacteria in a human host environment. *Proc Natl Acad Sci.* 2011; 7481–7486.
- 797 56. Smith EE, Buckley DG, Wu Z, Saenphimmachak C, Hoffman LR, D’Argenio DA, et al.  
798 Genetic adaptation by *Pseudomonas aeruginosa* to the airways of cystic fibrosis patients.  
799 *Proc Natl Acad Sci U S A.* 2006; 8487–92.
- 800 57. Woo TE, Duong J, Jervis NM, Rabin HR, Parkins MD, Storey DG, et al. Virulence  
801 adaptations of *Pseudomonas aeruginosa* isolated from patients with non-cystic fibrosis  
802 bronchiectasis. *Microbiology.* 2016; 2126–2135.
- 803 58. Feltner JB, Wolter DJ, Pope CE, Groleau MC, Smalley NE, Greenberg EP, et al. LasR  
804 variant cystic fibrosis isolates reveal an adaptable quorum-sensing hierarchy in  
805 *Pseudomonas aeruginosa*. *MBio.* 2016; 1–9.
- 806 59. Sandoz KM, Mitzimberg SM, Schuster M. Social cheating in *Pseudomonas aeruginosa*  
807 quorum sensing. *Proc Natl Acad Sci.* 2007; 15876–15881.
- 808 60. Folkesson A, Jelsbak L, Yang L, Johansen HK, Ciofu O, Høiby N, et al. Adaptation of  
809 *Pseudomonas aeruginosa* to the cystic fibrosis airway: an evolutionary perspective. *Nat Rev*  
810 *Microbiol.* 2012; 841–51.
- 811 61. O’Brien S, Williams D, Fothergill JL, Paterson S, Winstanley C, Brockhurst MA. High  
812 virulence sub-populations in *Pseudomonas aeruginosa* long-term cystic fibrosis airway  
813 infections. *BMC Microbiol.* 2017; 30.



- 814 62. Mowat E, Paterson S, Fothergill JL, Wright EA, Ledson MJ, Walshaw MJ, et al.  
815 *Pseudomonas aeruginosa* population diversity and turnover in cystic fibrosis chronic  
816 infections. *Am J Respir Crit Care Med*. 2011; 1674–1679.
- 817 63. Peleg AY, Hooper DC. Hospital Acquired Infections Due to Gram-Negative Bacteria. *N*  
818 *Engl J Med*. 2011; 1804–1813.
- 819 64. Gaynes R, Edwards JR. Overview of nosocomial infections caused by gram-negative  
820 bacilli. *Clin Infect Dis*. 2005; 848–854.
- 821 65. Cosgrove SE, Carmeli Y. The Impact of Antimicrobial Resistance on Health and Economic  
822 Outcomes. *Clin Infect Dis*. 2003; 1433–1437.
- 823 66. Stiernagle T. Maintenance of *C. elegans*. *WormBook: the online review of C. elegans*  
824 *biology*. *WormBook*. 2006.
- 825 67. Rasband WS. *ImageJ*. 1997.
- 826 68. Savoia D, Zucca M. Clinical and environmental *Burkholderia* Strains: Biofilm production  
827 and intracellular survival. *Curr Microbiol*. 2007; 440–444.
- 828 69. Langmead B, Salzberg SL. Fast gapped-read alignment with Bowtie 2. *Nat Methods*. 2012;  
829 357–360.
- 830 70. Li H. A statistical framework for SNP calling, mutation discovery, association mapping and  
831 population genetical parameter estimation from sequencing data. *Bioinformatics*. 2011;  
832 2987–2993.
- 833 71. Cingolani P, Platts A, Wang LL, Coon M, Nguyen T, Wang L, et al. A program for  
834 annotating and predicting the effects of single nucleotide polymorphisms, SnpEff: SNPs in  
835 the genome of *Drosophila melanogaster* strain w 1118; iso-2; iso-3. *Fly*. 2012; 80–92.
- 836 72. R Development Core Team. R: A language and environment for statistical computing. R  
837 Foundation for Statistical Computing. 2016.
- 838 73. Hadfield JD. MCMC methods for multi-response generalized linear mixed models: The  
839 MCMCglmm R package. *J Stat Softw*. 2010; 1–22.
- 840 74. Le S, Josse J, Husson F. FactoMineR: An R Package for Multivariate Analysis. *J Stat Softw*.  
841 2008; 1–18.

842

843 **SUPPLEMENTARY MATERIAL**

844 Figures S1-S5

845 Tables S1-S3
